# Supplementary material for: A three-dimensional-model inversion of methyl chloroform to constrain the atmospheric oxidative capacity
Source: Copernicus journal article supplement (doi:10.5194/acp-21-4809-2021), 2021-03-29
Supplement: Supplementary file [file acp-21-4809-2021-supplement-title-page.pdf › acp-21-4809-2021-supplement-title-page.pdf]

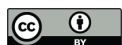

## *Supplement of*

# **A three-dimensional-model inversion of methyl chloroform to constrain the atmospheric oxidative capacity**

**Stijn Naus et al.**

*Correspondence to:* Stijn Naus (s.naus@sron.nl)

- acp-21-4809-2021-supplement-title-page.pdf
- .DS\_Store
- MCF\_emissions
  - .DS\_Store
  - MCF\_emissions\_optimized\_POP-10y.nc4
  - MCF\_emissions\_optimized\_POP-20y.nc4
  - MCF\_emissions\_optimized\_REF-10y.nc4
  - MCF\_emissions\_optimized\_REF-20y.nc4
  - MCF\_emissions\_optimized\_TM5OH-10y.nc4
  - MCF\_emissions\_optimized\_TM5OH-20y.nc4
  - MCF\_emissions\_prior\_POP-20y.nc4
  - MCF\_emissions\_prior\_REF-20y.nc4
- OH\_priors
  - OH\_prior\_fields.nc4
- OH\_scaling\_latitudinal
  - OH\_scaling\_latitudinal\_POP\_10y.nc4
  - OH\_scaling\_latitudinal\_POP\_20y.nc4
  - OH\_scaling\_latitudinal\_REF\_10y.nc4
  - OH\_scaling\_latitudinal\_REF\_20y.nc4
  - OH\_scaling\_latitudinal\_TM5OH\_10y.nc4
  - OH\_scaling\_latitudinal\_TM5OH\_20y.nc4
- kOH\_scaling\_global
  - kOH\_scaling\_global\_POP\_10y.nc4

- KOH\_scaling\_global\_POP\_20y.nc4
  - KOH\_scaling\_global\_REF\_10y.nc4
  - KOH\_scaling\_global\_REF\_20y.nc4
  - KOH\_scaling\_global\_TM5OH\_10y.nc4
  - KOH\_scaling\_global\_TM5OH\_20y.nc4
- readme\_supp\_data.docx
- supplements acp Naus et al 2020.pdf

The copyright of individual parts of the supplement might differ from the article licence.
